# Supplementary material for: Zinc-Chelating Mechanism of Sea Cucumber (Stichopus japonicus)-Derived Synthetic Peptides
Source: MDPI journal article supplement (doi:10.3390/md17080438), 2019-07-25
Supplement: s1 [file s1]

**Supporting information for:**

**Zinc-chelating mechanism of sea cucumber (*Stichopus japonicus*)-derived synthetic peptides**

Xiaoyang Liu<sup>1,2</sup>, Zixu Wang<sup>1</sup>, Fawen Yin<sup>1,2</sup>, YuXin Liu<sup>1,2</sup>, Ningbo Qin<sup>1,2</sup>, Yoshimasa Nakamura<sup>3</sup>, Fereidoon Shahidi<sup>4</sup>, Chenxu Yu<sup>2,5</sup>, Dayong Zhou<sup>1,2,\*</sup>, Beiwei Zhu<sup>1,2</sup>

<sup>1</sup> School of Food Science and Technology, Dalian Polytechnic University, Dalian, China, 116034

<sup>2</sup> National Engineering Research Center of Seafood, Dalian, PR China, 116034

<sup>3</sup> Graduate School of Environmental and Life Science, Okayama University, Okayama, Japan, 700-8530.

<sup>4</sup> Department of Biochemistry, Memorial University of Newfoundland, St. John's, NL A1B 3X9, Canada.

<sup>5</sup> Department of Agricultural and Biosystems Engineering, Iowa State University, IA 50011, USA

**Corresponding Authors:**

Dayong Zhou<sup>1,2,\*</sup>. E-mail: zdyzfl@163.com; Tel: +86-411 86323453

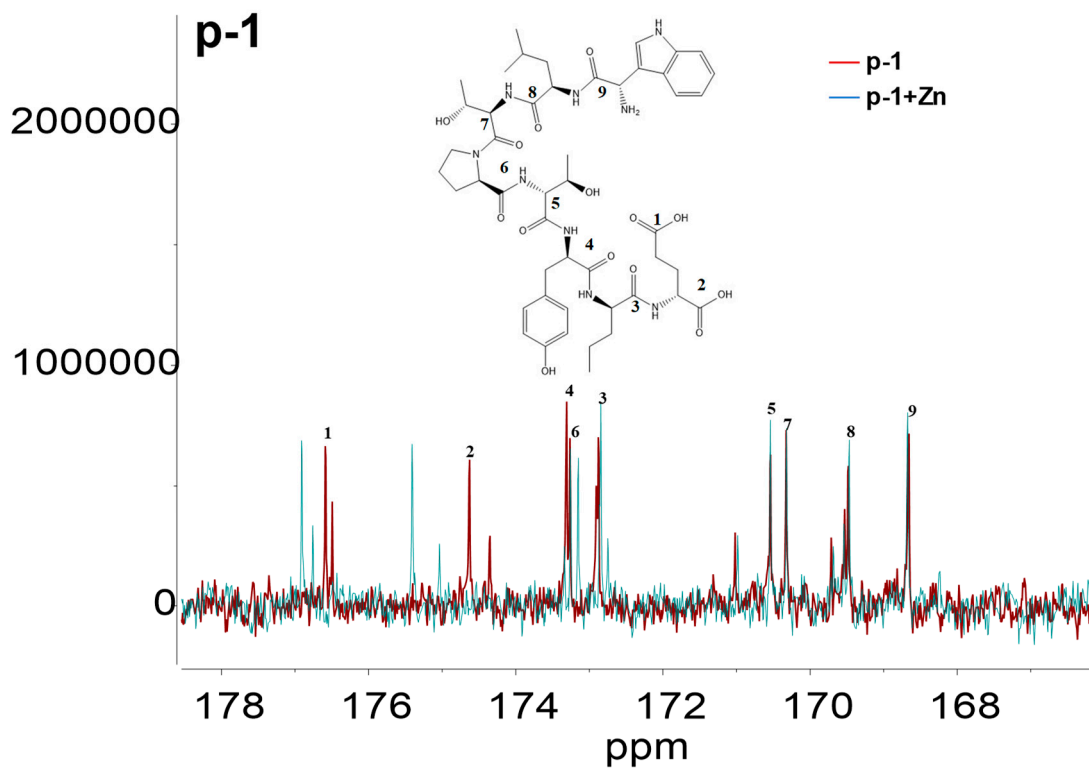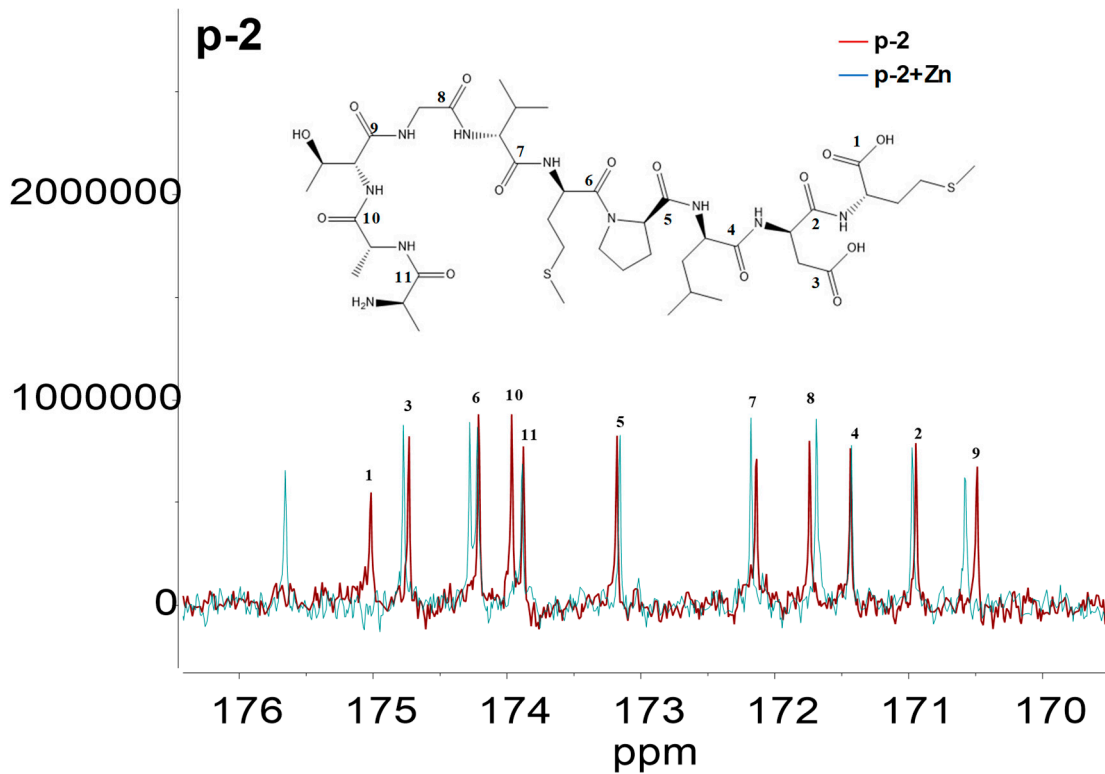

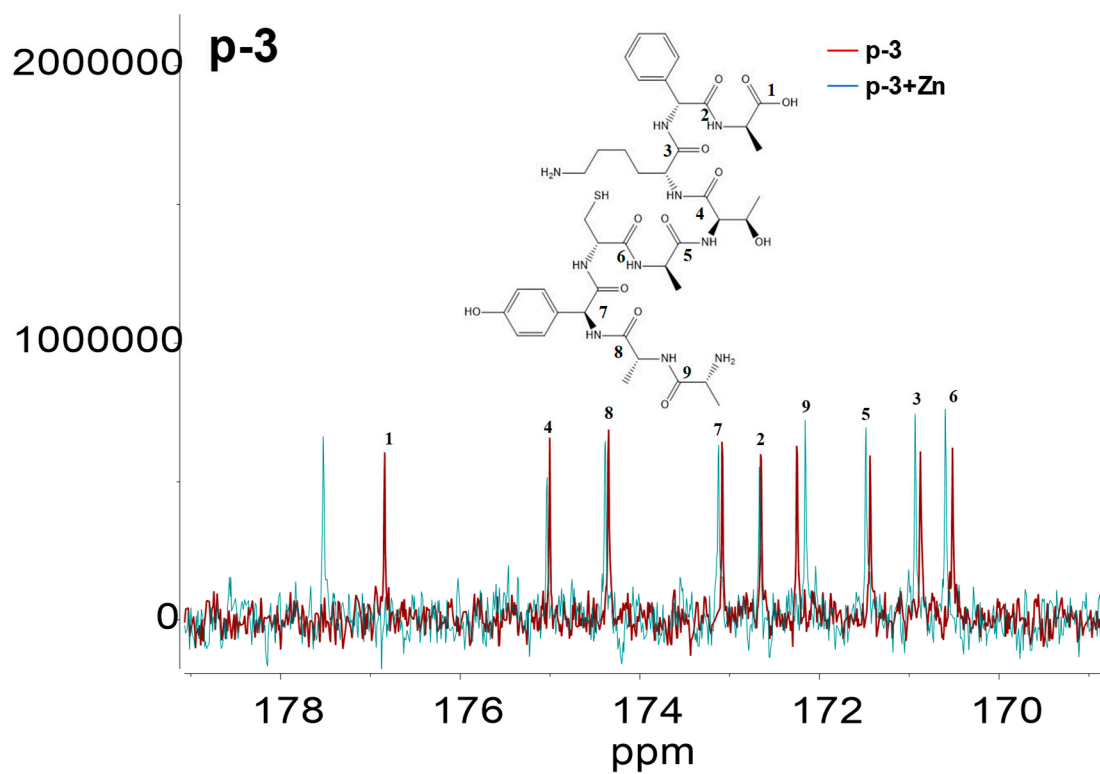

**Figure. S1**

$^{13}\text{C}$  NMR spectra of ZCPs and ZCP-zinc complexes from 160 to 180 ppm. Numbers represent designated carboxyl and acylamino.

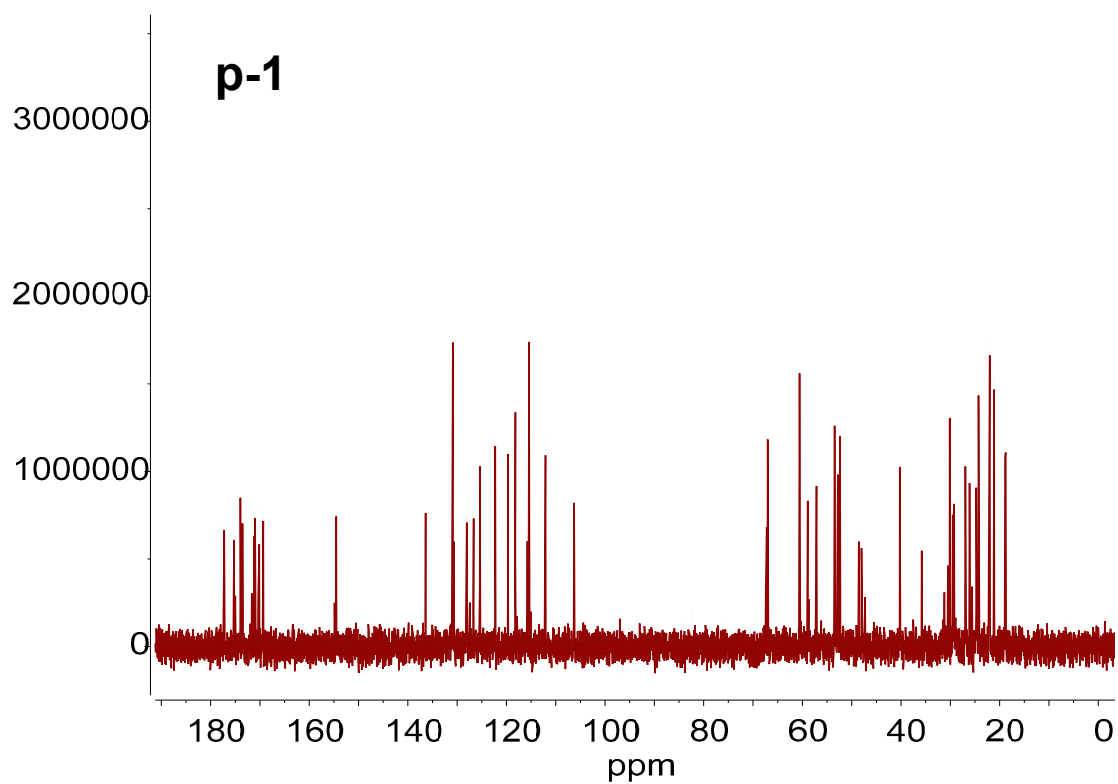

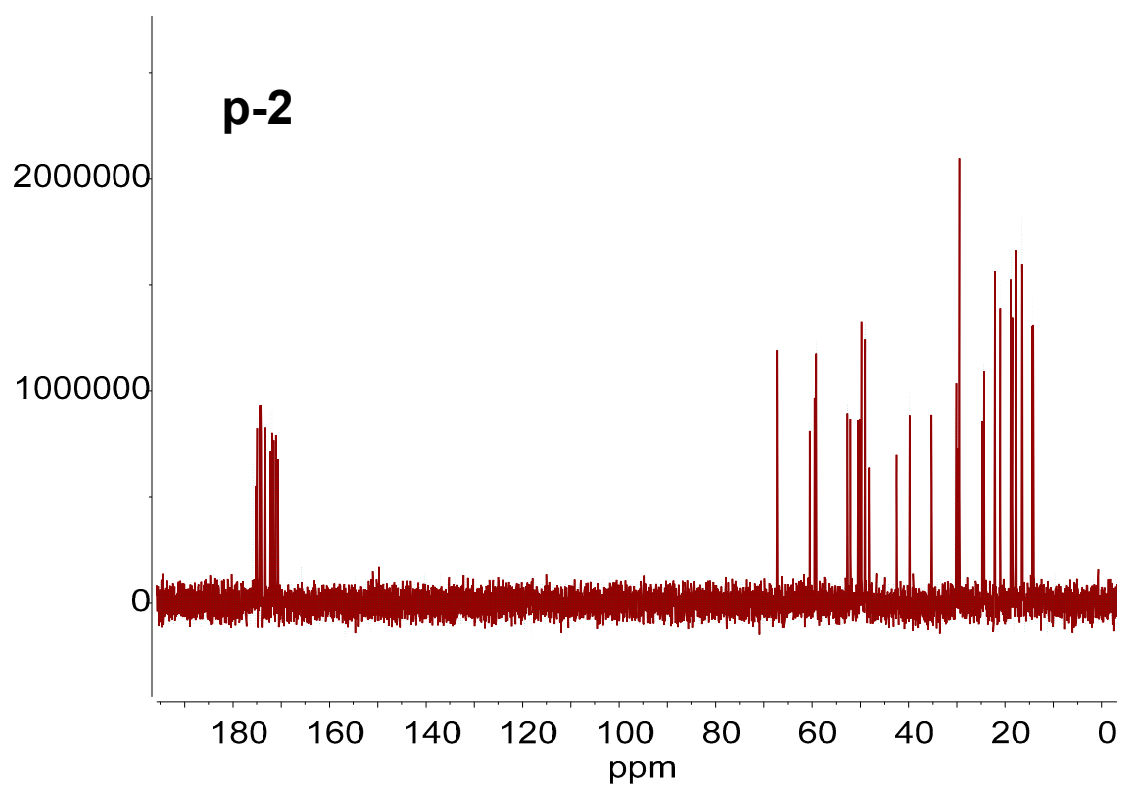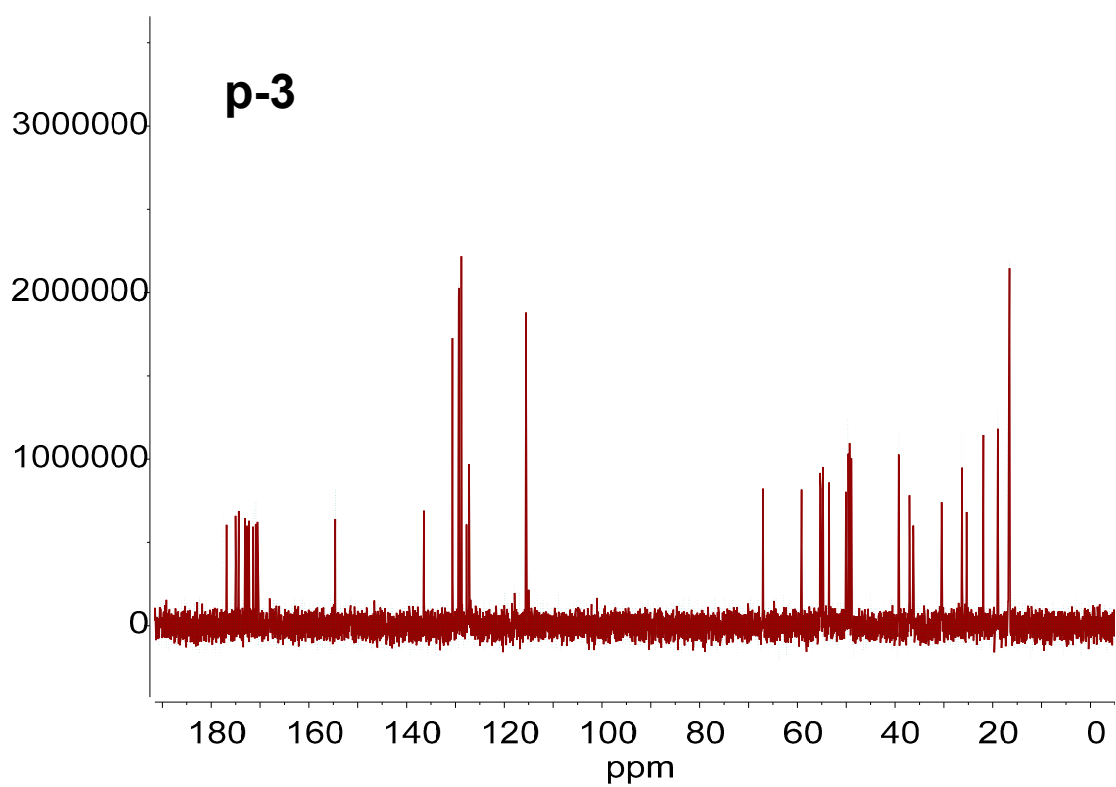

**Figure.S2**

Full spectra of <sup>13</sup>C NMR spectra of ZCPs and ZCP-zinc complexes.

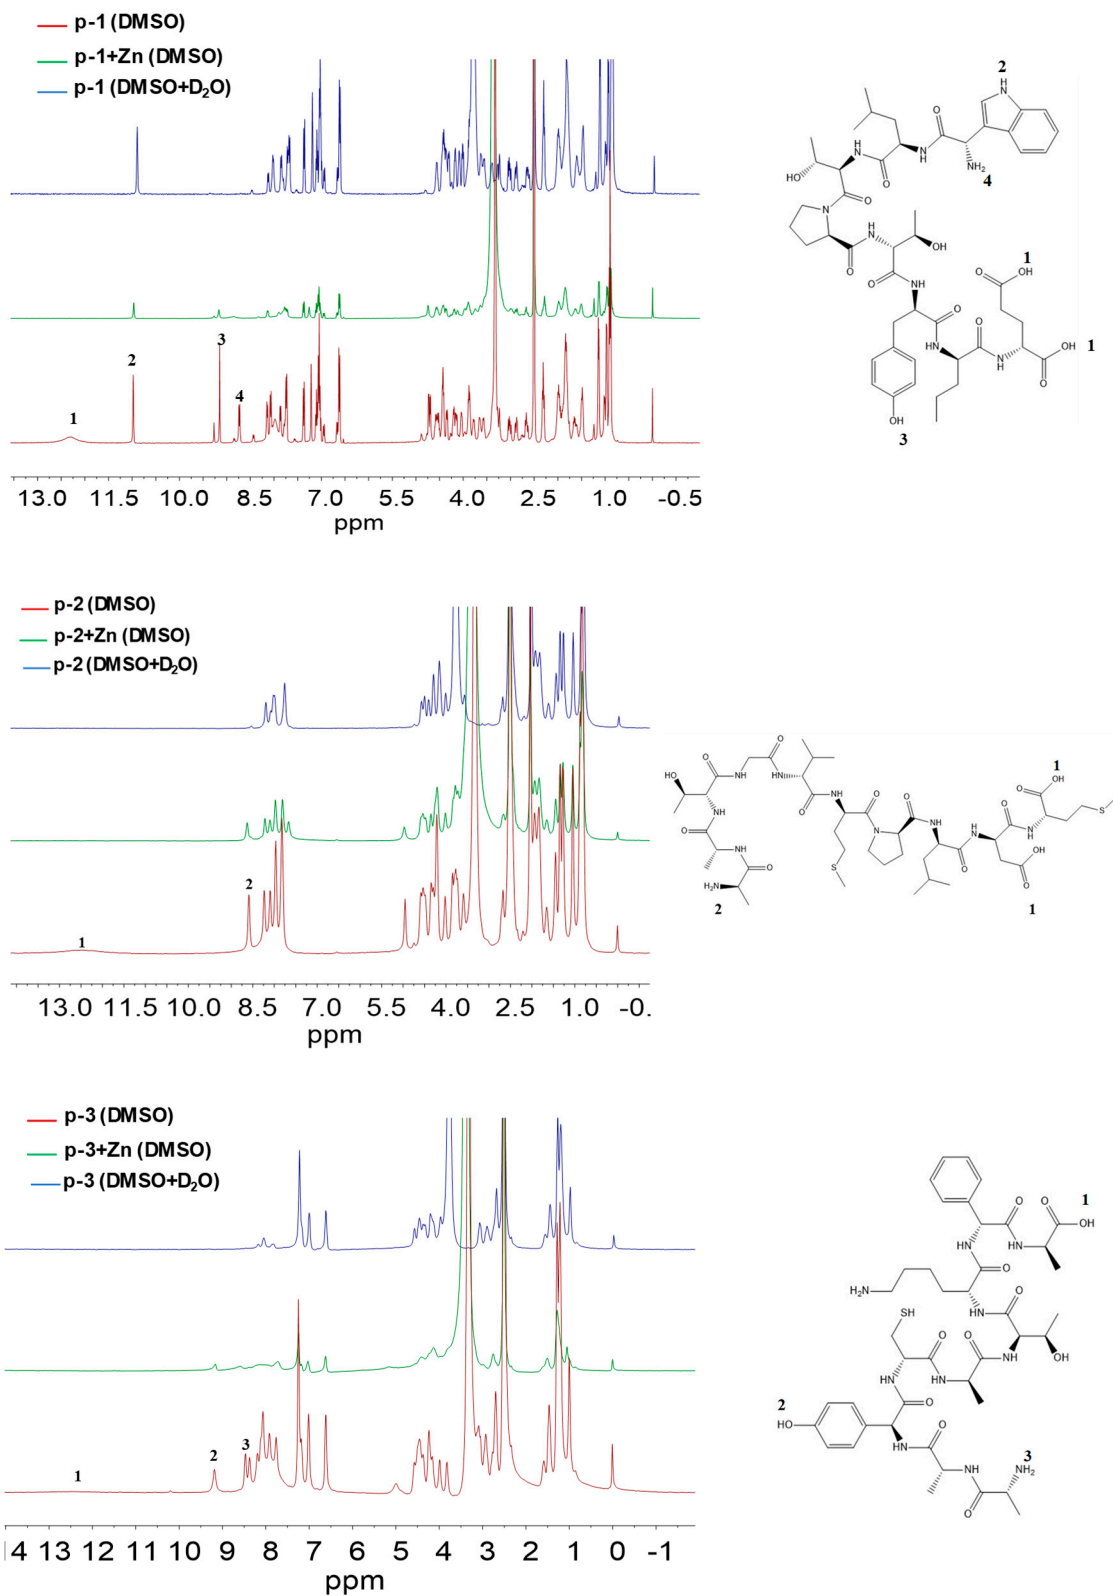

**Figure.S3**

<sup>1</sup>H NMR spectra of ZCPs and ZCP-zinc complexes (dissolved in DMSO-d<sub>6</sub> or DMSO-d<sub>6</sub>/10%D<sub>2</sub>O). Numbers represent designated hydrogen.
